# Supplementary material for: An Update on Sphingolipidomics: Is Something Still Missing? Some Considerations on the Analysis of Complex Sphingolipids and Free-Sphingoid Bases in Plasma and Red Blood Cells
Source: MDPI journal article supplement (doi:10.3390/metabo12050450), 2022-05-17
Supplement: s1 [file s1]

*Supplementary materials*

# An Update on Sphingolipidomics: Is Something Still Missing? Some Consideration on the Analysis of Complex Sphingolipids and Free-Sphingoid Bases in Plasma and Red Blood Cells

Camillo Morano<sup>1</sup>, Aida Zulueta<sup>2</sup>, Anna Caretti<sup>3</sup>, Gabriella Roda<sup>1</sup>, Rita Paroni<sup>3</sup>, Michele Dei Cas<sup>3,\*</sup>

<sup>1</sup> Department of Pharmaceutical Sciences, Università degli Studi di Milano, Milan, Italy; camillo.morano@unimi.it; gabriella.roda@unimi.it

<sup>2</sup> Neurorehabilitation Department, IRCCS Istituti Clinici Scientifici Maugeri, 20138 Milan, Italy; aida.zulueta@icsmaugeri.it;

<sup>3</sup> Department of Health Sciences, Università degli Studi di Milano, Milan, Italy; anna.caretti@unimi.it rita.paroni@unimi.it; michele.deicas@unimi.it

\* Correspondence: Dr. Michele Dei Cas, PhD, Department of Health Sciences, Università degli Studi di Milano, Milan, Italy, email address: michele.deicas@unimi.it

## Supplementary materials legend:

1. **Supplementary Figure S1.** Sphingoid bases concentrations in human plasma, according to scientific literature [18–26], (see paper for the references).
2. **Supplementary Figure S2.** Comparison between the sphingoid bases concentrations evidenced with (D, n=20) or without (ND, n=20) derivatization with phenylisothiocyanate.
3. **Supplementary Table S1.** Differences in signal intensities, expressed as fold-change on underivatized analytes, between the same concentration of sphingoid bases (1  $\mu$ M) after derivatization
4. **Supplementary Table S2.** RBCs sphingolipids levels (pmol/10<sup>6</sup> cells) in healthy volunteers (n=20) were expressed as min-max and mean $\pm$ SD
5. **Supplementary Table S3.** Mass spectrometry parameters for the analysis of complex sphingolipids. In bold are reported the internal standards (IS) used for each package of lipids
6. **Supplementary Table S4.** Mass spectrometry parameters for the analysis of free sphingoid bases
7. **Supplementary Table S5.** Mass spectrometry parameters for the analysis of sphingoid bases as phenylthiourea derivatives after reaction with phenylisothiocyanate
8. **Supplementary Table S6.** Mass spectrometry parameters for the analysis of sphingoid bases as nitrophenylthiourea derivatives after reaction with 4-nitrophenylisothiocyanate
9. **Supplementary Table S7.** The yield of derivatization products after different times and temperatures of reaction. Each experiment was conducted by adding the same amount of reagents, derivatizing agent (PITC), and catalyzer (Pyridine)

**Supplementary Figure S1.** Sphingoid bases concentrations in human plasma, according to scientific literature [18–26], (see paper for the references).

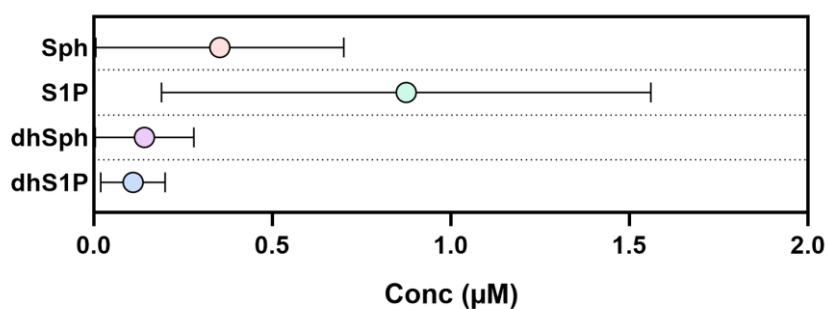

**Supplementary Figure S2.** Comparison between the sphingoid bases concentrations evidenced with (D, n=20) or without (ND, n=20) derivatization with phenylisothiocyanate.

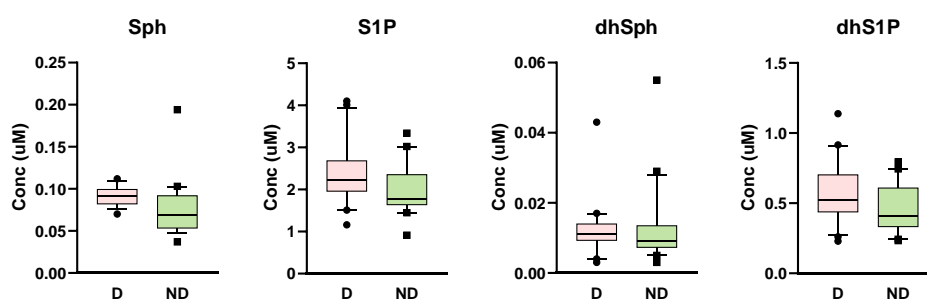

**Supplementary Table S1.** Differences in signal intensities, expressed as fold-change on underivatized analytes, between the same concentration of sphingoid bases (1  $\mu$ M) after derivatization.

| <b>Sphingoid base</b> | <b>Free</b> | <b>PITC</b> | <b>NO<sub>2</sub>PITC</b> |
|-----------------------|-------------|-------------|---------------------------|
| 3KS                   | 1           | 3.75        | 3.00                      |
| Sph                   | 1           | 1.56        | 1.66                      |
| S1P                   | 1           | 0.50        | 0.34                      |
| dhSph                 | 1           | 2.80        | 2.40                      |
| dhS1P                 | 1           | 1.00        | 0.54                      |

**Supplementary Table S2.** RBCs sphingolipids levels (pmol/10<sup>6</sup> cells) in healthy volunteers (n=20) were expressed as min-max and mean $\pm$ SD.

| <b>Conc (<math>\mu</math>M)</b> | <b>Min</b> | <b>Max</b> | <b>Mean<math>\pm</math>SD (n=20)</b> |
|---------------------------------|------------|------------|--------------------------------------|
| Cer                             | 12         | 29.7       | 18.6 $\pm$ 4.2                       |
| dhCer                           | 1.9        | 7.9        | 4.5 $\pm$ 1.6                        |
| SM                              | 171        | 400        | 277.4 $\pm$ 47.5                     |
| HexCer                          | 0.7        | 1.7        | 1.345 $\pm$ 0.302                    |
| LacCer                          | 4.3        | 23         | 12.83 $\pm$ 4.765                    |
| GM3                             | 0.3        | 0.9        | 0.655 $\pm$ 0.173                    |
| Sph                             | 0.34       | 2.3        | 0.698 $\pm$ 0.55                     |
| S1P                             | 0.52       | 3.4        | 1.11 $\pm$ 0.795                     |
| dhSph                           | 0.02       | 0.4        | 0.071 $\pm$ 0.082                    |
| dhS1P                           | 0.3        | 2.2        | 0.623 $\pm$ 0.512                    |

**Supplementary Table S3.** Mass spectrometry parameters for the analysis of complex sphingolipids. In bold are reported the internal standards (IS) used for each package of lipids.

| Name                               | MRM (+)        | DP (eV) | CE (eV) |
|------------------------------------|----------------|---------|---------|
| Ceramide (Cer) 12:0 (IS)           | 482.7 > 264.4  | 40      | 30      |
| Cer 14:0                           | 510.7 > 264.4  | 40      | 33      |
| Cer 16:0                           | 538.8 > 264.4  | 40      | 36      |
| Cer 18:1                           | 564.8 > 264.4  | 40      | 35      |
| Cer 18:0                           | 566.8 > 264.4  | 40      | 36      |
| Cer 20:0                           | 594.8 > 264.4  | 40      | 38      |
| Cer 22:0                           | 622.9 > 264.4  | 40      | 39      |
| Cer 24:1                           | 648.9 > 264.4  | 40      | 42      |
| Cer 24:0                           | 650.9 > 264.4  | 40      | 33      |
| Dihydroceramide (dhCer) 16:0       | 540.4 > 266.4  | 40      | 35      |
| dhCer 18:1                         | 566.5 > 266.4  | 40      | 35      |
| dhCer 18:0                         | 568.5 > 266.4  | 40      | 39      |
| dhCer 24:1                         | 650.5 > 266.4  | 40      | 40      |
| dhCer 24:0                         | 652.5 > 266.4  | 40      | 40      |
| Sphingomyelin (SM) 12:0 (IS)       | 647.6 > 184.3  | 40      | 29      |
| SM 16:0                            | 703.5 > 184.1  | 60      | 40      |
| SM 18:0                            | 731.6 > 184.1  | 60      | 40      |
| SM 18:1                            | 729.6 > 184.1  | 60      | 40      |
| SM 24:0                            | 815.7 > 184.1  | 60      | 40      |
| SM 24:1                            | 813.7 > 184.1  | 60      | 40      |
| Hexosylceramide (HexCer) 12:0 (IS) | 644.5 > 264.3  | 40      | 50      |
| HexCer 16:0                        | 700.6 > 264.3  | 40      | 50      |
| HexCer 18:0                        | 728.6 > 264.3  | 40      | 50      |
| HexCer 18:1                        | 726.6 > 264.3  | 40      | 50      |
| HexCer 20:0                        | 756.6 > 264.3  | 40      | 50      |
| HexCer 22:0                        | 784.7 > 264.3  | 40      | 50      |
| HexCer 24:0                        | 812.7 > 264.3  | 40      | 50      |
| HexCer 24:1                        | 810.7 > 264.3  | 40      | 50      |
| Lactosylceramide (LacCer) 16:0     | 862.6 > 264.3  | 60      | 60      |
| LacCer 18:0                        | 890.7 > 264.3  | 60      | 60      |
| LacCer 18:1                        | 888.7 > 264.3  | 60      | 60      |
| LacCer 20:0                        | 918.7 > 264.3  | 60      | 60      |
| LacCer 22:0                        | 946.7 > 264.3  | 60      | 60      |
| LacCer 24:0                        | 974.8 > 264.3  | 60      | 60      |
| LacCer 24:1                        | 972.7 > 264.3  | 60      | 60      |
| Ganglioside GM3 (GM3) 16:0         | 1153.7 > 264.3 | 70      | 60      |
| GM3 18:0                           | 1181.7 > 264.3 | 70      | 60      |
| GM3 18:1                           | 1179.8 > 264.3 | 70      | 60      |
| GM3 20:0                           | 1209.8 > 264.3 | 70      | 60      |
| GM3 22:0                           | 1237.8 > 264.3 | 70      | 60      |
| GM3 24:0                           | 1265.8 > 264.3 | 70      | 60      |
| GM3 24:1                           | 1263.8 > 264.3 | 70      | 60      |

**Supplementary Table S4.** Mass spectrometry parameters for the analysis of free sphingoid bases.

| Name                                   | MRM (+)       | DP (eV) | CE (eV) |
|----------------------------------------|---------------|---------|---------|
| Sphinganine d17:0 (IS)                 | 288.4 > 252.0 | 21      | 20      |
| 3-ketosphinganine (3KS)                | 300.0 > 270.4 | 46      | 23      |
| Sphingosine (Sph)                      | 300.3 > 282.2 | 21      | 17      |
| Sphingosine-1-phosphate (S1P)          | 380.2 > 264.3 | 26      | 21      |
| Dihydrosphingosine (dhSph)             | 302.2 > 284.5 | 31      | 19      |
| Dihydrosphingosine-1-phosphate (dhS1P) | 382.4 > 284.5 | 46      | 19      |

**Supplementary Table S5.** Mass spectrometry parameters for the analysis of sphingoid bases as phenylthiourea derivatives after reaction with phenylisothiocyanate.

| Name                   | MRM (+)       | DP (eV) | CE (eV) |
|------------------------|---------------|---------|---------|
| Sphinganine d17:0 (IS) | 423.3 > 270.0 | 50      | 27      |
| 3KS                    | 435.3 > 282.2 | 46      | 29      |
| Sph                    | 435.3 > 399.5 | 36      | 21      |
| S1P                    | 515.3 > 399.5 | 50      | 31      |
| dhSph                  | 437.3 > 419.3 | 50      | 25      |
| dhS1P                  | 517.3 > 419.3 | 51      | 23      |

**Supplementary Table S6.** Mass spectrometry parameters for the analysis of sphingoid bases as nitrophenylthiourea derivatives after reaction with 4-nitrophenylisothiocyanate.

| Name                   | MRM (-)       | DP (eV) | CE (eV) |
|------------------------|---------------|---------|---------|
| Sphinganine d17:0 (IS) | 466.2 > 137.0 | -50     | -45     |
| 3KS                    | 478.3 > 137.0 | -50     | -45     |
| Sph                    | 478.3 > 137.0 | -50     | -45     |
| S1P                    | 588.2 > 378.2 | -70     | -28     |
| dhSph                  | 480.3 > 137.0 | -50     | -45     |
| dhS1P                  | 560.3 > 380.2 | -70     | -50     |

**Supplementary Table S7.** The yield of derivatization products after different times and temperatures of reaction. Each experiment was conducted by adding the same amount of reagents, derivatizing agent (PITC) and catalyzer (Pyridine).

| Temperature (°C)       | 40   | 60    | 60    | 70    | 70    | 80    |
|------------------------|------|-------|-------|-------|-------|-------|
| Time (min)             | 15   | 60    | 120   | 60    | 120   | 60    |
| Sphinganine d17:0 (IS) | 99.9 | 100.0 | 100.0 | 100.0 | 100.0 | 100.0 |
| 3KS                    | 99.7 | 100.0 | 100.0 | 100.0 | 100.0 | 100.0 |
| Sph                    | 97.6 | 99.8  | 99.9  | 100.0 | 100.0 | 99.9  |
| S1P                    | 8.4  | 77.5  | 90.0  | 97.4  | 100.0 | 99.4  |
| dhSph                  | 97.7 | 99.9  | 99.9  | 99.9  | 99.9  | 100.0 |
| dhS1P                  | 28.8 | 92.4  | 96.9  | 99.2  | 100.0 | 99.8  |
